# Supplementary material for: DART: deep learning enabled topological interaction model for energy prediction of metal clusters and its application in identifying unique low energy isomers
Source: Royal Society of Chemistry journal article supplement (doi:10.1039/d1cp02956h), 2021-01-01
Supplement: d1cp02956h1.pdf [file d1cp02956h1.pdf]

Supplementary Information for "DART: Deep Learning  
Enabled Topological Interaction Model for Energy  
Prediction of Metal Clusters and its Application in  
Identifying Unique Low Energy Isomers"

Rohit Modee<sup>a</sup>, Sheena Agarwal<sup>b,c</sup>, Ashwini Verma<sup>b</sup>, Kavita Joshi<sup>\*b,c</sup>, U. Deva  
Priyakumar<sup>\*a</sup>

<sup>a</sup>*Center for Computational Natural Sciences and Bioinformatics, International Institute of Information  
Technology, Hyderabad 500032, India*

<sup>b</sup>*Physical and Materials Chemistry Division, CSIR-National Chemical Laboratory, Dr. Homi Bhabha  
Road, Pune-411008, India.*

<sup>c</sup>*Academy of Scientific and Innovative Research (AcSIR), Ghaziabad, Uttar Pradesh- 201002, India.*

---

*Email addresses: k.joshi@ncl.res.in (Kavita Joshi\*), deva@iiit.ac.in (U. Deva Priyakumar\*)*

| Model                 | DART (values in kcal/mol) |       |              |
|-----------------------|---------------------------|-------|--------------|
|                       | MAE                       | RMSE  | # structures |
| Test case 1 (overall) | 4.77                      | 6.16  | 427          |
| Test set Ga-46        | 10.13                     | 10.81 | 48           |
| Test set Ga-57        | 3.59                      | 4.82  | 197          |
| Test set Ga-60        | 4.63                      | 5.77  | 182          |

Table 1: Performance of DART model on first test case which has total of 427 structures in the test set consisting of Ga - 46, 57, and 60 size clusters.

| Model                 | DART (values in kcal/mol) |      |              |
|-----------------------|---------------------------|------|--------------|
|                       | MAE                       | RMSE | # structures |
| Test case 2 (overall) | 4.76                      | 6.02 | 436          |
| Test set Ga-46        | 7.45                      | 8.07 | 48           |
| Test set Ga-57        | 4.15                      | 5.59 | 197          |
| Test set Ga-66        | 4.72                      | 5.84 | 191          |

Table 2: Performance of DART model on second test case which has total of 436 structures in the test set consisting of Ga - 46, 57, and 66 size clusters.

| Model                 | DART (values in kcal/mol) |      |              |
|-----------------------|---------------------------|------|--------------|
|                       | MAE                       | RMSE | # structures |
| Test case 3 (overall) | 4.34                      | 5.58 | 570          |
| Test set Ga-57        | 3.69                      | 4.78 | 197          |
| Test set Ga-60        | 4.93                      | 6.15 | 182          |
| Test set Ga-66        | 4.45                      | 5.77 | 191          |

Table 3: Performance of DART model on third test case which has total of 570 structures in the test set consisting of Ga - 57, 60, and 66 size clusters.
